# Supplementary material for: Highly Fluorescent Carbon Dots as a Potential Fluorescence Probe for Selective Sensing of Ferric Ions in Aqueous Solution
Source: MDPI journal article supplement (doi:10.3390/chemosensors9110301), 2021-10-25
Supplement: s1 [file s1]

Archive with 1 entries (1 files):
- chemosensors-1422989-supplementary.pdf
